# Supplementary material
Source: MDPI journal article supplement (https://www.mdpi.com/2073-4395/11/8/1549)
Supplement: s1 [file s1]

Archive with 3 entries (3 files):
- Supplementary Figures S1-S5.pdf
- Supplementary Tables S1-S6.pdf
- Supplementary Text S1.pdf
