# Supplementary material
Source: MDPI journal article supplement (https://www.mdpi.com/2073-4395/11/8/1549)
Supplement: s1 [file s1 › Supplementary Tables S1-S6.pdf]

**Table S1.** Effect size ( $L$ ) and corresponding statistics estimated by GLMMs of the control of Fusarium head blight (FHB) incidence, with different fungicides applied based on wheat growth stages (EXP1).

| Growth stage <sup>a</sup> | Fungicide treatment <sup>b</sup> | Effect size <sup>c</sup> |            |               |        |        |        |
|---------------------------|----------------------------------|--------------------------|------------|---------------|--------|--------|--------|
|                           |                                  | $L$                      | se ( $L$ ) | 95% CI of $L$ |        | $Z$    | $P(Z)$ |
| GS55                      | T1                               | -0.514                   | 0.171      | -0.849        | -0.178 | -2.997 | <0.003 |
|                           | T2                               | -0.769                   | 0.185      | -1.131        | -0.408 | -4.167 | <0.001 |
|                           | T5                               | -0.990                   | 0.269      | -1.518        | -0.462 | -3.676 | <0.001 |
|                           | T6                               | -0.190                   | 0.221      | -0.624        | 0.243  | -0.861 | 0.389  |
| GS59                      | T1                               | -0.981                   | 0.174      | -1.322        | -0.639 | -5.628 | <0.001 |
|                           | T2                               | -1.190                   | 0.187      | -1.558        | -0.823 | -6.355 | <0.001 |
|                           | T5                               | -1.155                   | 0.271      | -1.686        | -0.623 | -4.258 | <0.001 |
|                           | T6                               | -0.483                   | 0.223      | -0.920        | -0.046 | -2.168 | 0.030  |
| GS61                      | T1                               | -0.678                   | 0.172      | -1.014        | -0.341 | -3.945 | <0.001 |
|                           | T2                               | -1.043                   | 0.185      | -1.406        | -0.681 | -5.641 | <0.001 |
|                           | T5                               | -0.857                   | 0.269      | -1.385        | -0.330 | -3.187 | <0.001 |
|                           | T6                               | -0.130                   | 0.222      | -0.566        | 0.306  | -0.585 | 0.558  |
| GS69                      | T1                               | -0.704                   | 0.172      | -1.042        | -0.366 | -4.080 | <0.001 |
|                           | T2                               | -1.150                   | 0.186      | -1.515        | -0.786 | -6.183 | <0.001 |
|                           | T5                               | -1.014                   | 0.270      | -1.543        | -0.484 | -3.752 | <0.001 |
|                           | T6                               | -0.363                   | 0.222      | -0.799        | 0.0719 | -1.636 | 0.102  |

<sup>a</sup> Fungicides were applied at four fixed growth stages of wheat: half of heading, half of heads emerged (GS55, Meier, 2001); end of heading (GS59); beginning of flowering, first anthers visible (GS61); end of flowering, all spikelets have completed flowering but some dehydrated anthers may remain (GS69).

<sup>b</sup> Fungicide treatments were grouped as T1 (when contain only DMI), T2 when contain DMI and QoI (Quinone outside Inhibitors), T5 when contain DMI and MS (Multi-Site) and T6 when contain DMI and MBC.

<sup>c</sup> Model 1.4 in Table 3;  $L$ , log-transformed response ratio for each treatment relative to the non-treated control; se( $L$ ), standard error of  $L$ ; 95% CI of  $L$ , limits of the 95% confidence interval of  $L$ ;  $Z$ , standard normal statistic from the GLMM, probability value (significant level) of  $Z$ .

**Table S2.** Effect size ( $L$ ) and corresponding statistics estimated by GLMMs of the control of Fusarium head blight (FHB) severity, with different fungicides applied based on wheat growth stages (EXP1).

| Growth stage <sup>a</sup> | Fungicide treatment <sup>b</sup> | Effect size <sup>c</sup> |            |               |        |        |        |
|---------------------------|----------------------------------|--------------------------|------------|---------------|--------|--------|--------|
|                           |                                  | $L$                      | se ( $L$ ) | 95% CI of $L$ |        | $Z$    | $P(Z)$ |
| GS55                      | T1                               | -0.330                   | 0.089      | -0.506        | -0.154 | -3.684 | <0.001 |
|                           | T2                               | -0.335                   | 0.093      | -0.519        | -0.152 | -3.59  | <0.001 |
|                           | T5                               | -0.428                   | 0.144      | -0.711        | -0.145 | -2.967 | 0.003  |
|                           | T6                               | -0.254                   | 0.117      | -0.483        | -0.026 | -2.18  | 0.030  |
| GS59                      | T1                               | -0.448                   | 0.090      | -0.624        | -0.273 | -5.004 | <0.001 |
|                           | T2                               | -0.473                   | 0.093      | -0.656        | -0.290 | -5.061 | <0.001 |
|                           | T5                               | -0.426                   | 0.144      | -0.709        | -0.143 | -2.947 | 0.003  |
|                           | T6                               | -0.392                   | 0.117      | -0.620        | -0.163 | -3.359 | <0.001 |
| GS61                      | T1                               | -0.402                   | 0.089      | -0.577        | -0.226 | -4.484 | <0.001 |
|                           | T2                               | -0.410                   | 0.093      | -0.593        | -0.227 | -4.395 | <0.001 |
|                           | T5                               | -0.393                   | 0.144      | -0.676        | -0.110 | -2.72  | 0.006  |
|                           | T6                               | -0.229                   | 0.117      | -0.458        | 0.000  | -1.959 | 0.050  |
| GS69                      | T1                               | -0.361                   | 0.089      | -0.537        | -0.186 | -4.033 | <0.001 |
|                           | T2                               | -0.389                   | 0.093      | -0.572        | -0.206 | -4.163 | <0.001 |
|                           | T5                               | -0.409                   | 0.144      | -0.692        | -0.126 | -2.829 | 0.004  |
|                           | T6                               | -0.295                   | 0.117      | -0.524        | -0.066 | -2.526 | 0.011  |

<sup>a</sup> Fungicides were applied at four fixed growth stages of wheat: half of heading, half of heads emerged (GS55, Meier, 2001); end of heading (GS59); beginning of flowering, first anthers visible (GS61); end of flowering, all spikelets have completed flowering but some dehydrated anthers may remain (GS69).

<sup>b</sup> Fungicide treatments were grouped as T1 (when contain only DMI), T2 when contain DMI and QoI (Quinone outside Inhibitors), T5 when contain DMI and MS (Multi-Site) and T6 when contain DMI and MBC.

<sup>c</sup> Model 1.8 in Table 3;  $L$ , log-transformed response ratio for each treatment relative to the non-treated control; se( $L$ ), standard error of  $L$ ; 95% CI of  $L$ , limits of the 95% confidence interval of  $L$ ;  $Z$ , standard normal statistic from the GLMM, probability value (significant level) of  $Z$ .

**Table S3.** Effect size ( $L$ ) and corresponding statistics estimated by GLMMs in the reduction of DON, with different fungicides applied based on wheat growth stages (EXP1).

| Growth stage <sup>a</sup> | Fungicide treatment <sup>b</sup> | Effect size <sup>c</sup> |            |               |        |        |        |
|---------------------------|----------------------------------|--------------------------|------------|---------------|--------|--------|--------|
|                           |                                  | $L$                      | se ( $L$ ) | 95% CI of $L$ |        | $Z$    | $P(Z)$ |
| GS55                      | T1                               | -0.332                   | 0.065      | -0.459        | -0.205 | -5.108 | <0.001 |
|                           | T2                               | -0.272                   | 0.068      | -0.405        | -0.138 | -3.994 | <0.001 |
|                           | T5                               | -0.402                   | 0.109      | -0.615        | -0.189 | -3.695 | <0.001 |
|                           | T6                               | -0.257                   | 0.085      | -0.423        | -0.091 | -3.035 | <0.001 |
| GS59                      | T1                               | -0.382                   | 0.065      | -0.509        | -0.254 | -5.867 | <0.001 |
|                           | T2                               | -0.368                   | 0.068      | -0.502        | -0.234 | -5.399 | <0.001 |
|                           | T5                               | -0.323                   | 0.109      | -0.536        | -0.110 | -2.976 | 0.003  |
|                           | T6                               | -0.402                   | 0.085      | -0.569        | -0.235 | -4.714 | <0.001 |
| GS61                      | T1                               | -0.394                   | 0.065      | -0.522        | -0.267 | -6.065 | <0.001 |
|                           | T2                               | -0.321                   | 0.068      | -0.454        | -0.188 | -4.719 | <0.001 |
|                           | T5                               | -0.361                   | 0.109      | -0.573        | -0.148 | -3.322 | 0.001  |
|                           | T6                               | -0.249                   | 0.085      | -0.415        | -0.082 | -2.932 | 0.003  |
| GS69                      | T1                               | -0.321                   | 0.065      | -0.449        | -0.194 | -4.941 | <0.001 |
|                           | T2                               | -0.247                   | 0.068      | -0.381        | -0.114 | -3.637 | <0.001 |
|                           | T5                               | -0.356                   | 0.109      | -0.568        | -0.143 | -3.273 | 0.001  |
|                           | T6                               | -0.296                   | 0.085      | -0.462        | -0.129 | -3.479 | 0.001  |

<sup>a</sup> Fungicides were applied at four fixed growth stages of wheat: half of heading, half of heads emerged (GS55, Meier, 2001); end of heading (GS59); beginning of flowering, first anthers visible (GS61); end of flowering, all spikelets have completed flowering but some dehydrated anthers may remain (GS69).

<sup>b</sup> Fungicide treatments were grouped as T1 (when contain only DMI), T2 when contain DMI and QoI (Quinone outside Inhibitors), T5 when contain DMI and MS (Multi-Site) and T6 when contain DMI and MBC.

<sup>c</sup> Model 1.12 in Table 3;  $L$ , log-transformed response ratio for each treatment relative to the non-treated control; se( $L$ ), standard error of  $L$ ; 95% CI of  $L$ , limits of the 95% confidence interval of  $L$ ;  $Z$ , standard normal statistic from the GLMM, probability value (significant level) of  $Z$ .

**Table S4.** Effect size ( $L$ ) and corresponding statistics estimated by GLMMs of the control of Fusarium head blight (FHB) incidence with different fungicides applied based on days before or after artificial inoculation of spikes with *Fusarium graminearum* (EXP2).

| Timing <sup>a</sup> | Fungicide treatment <sup>b</sup> | Effect size <sup>c</sup> |            |               |        |        |        |
|---------------------|----------------------------------|--------------------------|------------|---------------|--------|--------|--------|
|                     |                                  | $L$                      | se ( $L$ ) | 95% CI of $L$ |        | $Z$    | $P(Z)$ |
| -10DI               | T1                               | -1.364                   | 0.271      | -1.895        | -0.833 | -5.034 | <0.001 |
|                     | T3                               | -2.554                   | 0.494      | -3.522        | -1.587 | -5.175 | <0.001 |
|                     | T4                               | -0.081                   | 0.376      | -0.818        | 0.657  | -0.214 | 0.830  |
| -7DI                | T1                               | -2.075                   | 0.273      | -2.610        | -1.540 | -7.603 | <0.001 |
|                     | T3                               | -3.350                   | 0.495      | -4.320        | -2.381 | -6.772 | <0.001 |
|                     | T4                               | -0.630                   | 0.393      | -1.401        | 0.140  | -1.603 | 0.109  |
| -4DI                | T1                               | -2.332                   | 0.274      | -2.870        | -1.794 | -8.499 | <0.001 |
|                     | T3                               | -4.185                   | 0.516      | -5.196        | -3.174 | -8.111 | <0.001 |
|                     | T4                               | -0.953                   | 0.419      | -1.774        | -0.132 | -2.275 | 0.023  |
| -1DI                | T1                               | -2.513                   | 0.276      | -3.053        | -1.973 | -9.121 | <0.001 |
|                     | T3                               | -4.302                   | 0.524      | -5.330        | -3.275 | -8.208 | <0.001 |
|                     | T4                               | -0.483                   | 0.397      | -1.261        | 0.295  | -1.216 | 0.224  |
| 3DI                 | T1                               | -1.044                   | 0.271      | -1.575        | -0.514 | -3.857 | <0.001 |
|                     | T3                               | -1.827                   | 0.499      | -2.806        | -0.848 | -3.659 | <0.001 |
|                     | T4                               | -0.663                   | 0.406      | -1.459        | 0.134  | -1.631 | 0.103  |
| 5DI                 | T1                               | -0.871                   | 0.270      | -1.400        | -0.342 | -3.227 | 0.001  |
|                     | T3                               | -0.868                   | 0.544      | -1.934        | 0.199  | -1.595 | 0.111  |
|                     | T4                               | -0.564                   | 0.390      | -1.328        | 0.200  | -1.447 | 0.148  |

<sup>a</sup> Fungicides were applied 1, 7, 4 or 10 days before, or 3 or 5 days after the day of inoculation (DI) with a mixture of *F. graminearum* strains.

<sup>b</sup> Fungicide treatments were grouped as T1 (when contain only DMI), T3 when contain DMI and SDHI, and T4 when contain MBC.

<sup>c</sup> Model 2.4 in Table 3;  $L$ , log-transformed response ratio for each treatment relative to the non-treated control; se( $L$ ), standard error of  $L$ ; 95% CI of  $L$ , limits of the 95% confidence interval of  $L$ ;  $Z$ , standard normal statistic from the GLMM, probability value (significant level) of  $Z$ .

**Table S5.** Effect size ( $L$ ) and corresponding statistics estimated by GLMMs of the control of Fusarium head blight (FHB) severity with different fungicides applied based on days before or after artificial inoculation of spikes with *Fusarium graminearum* (EXP2).

| Timing <sup>a</sup> | Fungicide treatment <sup>b</sup> | Effect size <sup>c</sup> |            |               |        |         |        |
|---------------------|----------------------------------|--------------------------|------------|---------------|--------|---------|--------|
|                     |                                  | $L$                      | se ( $L$ ) | 95% CI of $L$ |        | $Z$     | $P(Z)$ |
| -10DI               | T1                               | -0.730                   | 0.105      | -0.936        | -0.524 | -6.932  | <0.001 |
|                     | T3                               | -1.377                   | 0.154      | -1.679        | -1.075 | -8.940  | <0.001 |
|                     | T4                               | -0.049                   | 0.161      | -0.364        | 0.266  | -0.305  | 0.761  |
| -7DI                | T1                               | -0.691                   | 0.106      | -0.900        | -0.483 | -6.514  | <0.001 |
|                     | T3                               | -1.414                   | 0.155      | -1.718        | -1.111 | -9.126  | <0.001 |
|                     | T4                               | 0.009                    | 0.161      | -0.307        | 0.326  | 0.059   | 0.953  |
| -4DI                | T1                               | -0.911                   | 0.105      | -1.117        | -0.704 | -8.632  | <0.001 |
|                     | T3                               | -1.739                   | 0.155      | -2.043        | -1.436 | -11.247 | <0.001 |
|                     | T4                               | -0.216                   | 0.161      | -0.531        | 0.099  | -1.345  | 0.179  |
| -1DI                | T1                               | -0.902                   | 0.106      | -1.110        | -0.695 | -8.529  | <0.001 |
|                     | T3                               | -1.721                   | 0.155      | -2.025        | -1.418 | -11.115 | <0.001 |
|                     | T4                               | -0.094                   | 0.161      | -0.410        | 0.221  | -0.586  | 0.558  |
| 3DI                 | T1                               | -0.660                   | 0.105      | -0.867        | -0.454 | -6.276  | <0.001 |
|                     | T3                               | -1.102                   | 0.153      | -1.402        | -0.801 | -7.19   | <0.001 |
|                     | T4                               | -0.192                   | 0.161      | -0.508        | 0.123  | -1.196  | 0.232  |
| 5DI                 | T1                               | -0.342                   | 0.106      | -0.550        | -0.135 | -3.234  | 0.001  |
|                     | T3                               | -0.519                   | 0.152      | -0.817        | -0.221 | -3.414  | 0.001  |
|                     | T4                               | 0.013                    | 0.161      | -0.303        | 0.330  | 0.082   | 0.935  |

<sup>a</sup> Fungicides were applied 1, 7, 4 or 10 days before, or 3 or 5 days after the day of inoculation (DI) with a mixture of *F. graminearum* strains.

<sup>b</sup> Fungicide treatments were grouped as T1 (when contain only DMI), T3 when contain DMI and SDHI, and T4 when contain MBC.

<sup>c</sup> Model 2.8 in Table 3;  $L$ , log-transformed response ratio for each treatment relative to the non-treated control; se( $L$ ), standard error of  $L$ ; 95% CI of  $L$ , limits of the 95% confidence interval of  $L$ ;  $Z$ , standard normal statistic from the GLMM, probability value (significant level) of  $Z$ .

**Table S6.** Effect size ( $L$ ) and corresponding statistics estimated by GLMMs of the reduction of DON with different fungicides applied based on days before or after artificial inoculation of spikes with *Fusarium graminearum* (EXP2).

| Timing | Fungicide treatment <sup>a</sup> | $L^b$  | se ( $L$ ) <sup>c</sup> | 95% CI of $L^d$ |        | $Z^e$   | $P(Z)^f$ |
|--------|----------------------------------|--------|-------------------------|-----------------|--------|---------|----------|
| -10DI  | T1                               | -1.376 | 0.126                   | -1.623          | -1.130 | -10.953 | <0.001   |
|        | T3                               | -2.286 | 0.192                   | -2.662          | -1.909 | -11.896 | <0.001   |
|        | T4                               | 0.025  | 0.197                   | -0.361          | 0.411  | 0.128   | 0.898    |
| -7DI   | T1                               | -1.133 | 0.129                   | -1.386          | -0.881 | -8.795  | <0.001   |
|        | T3                               | -2.196 | 0.192                   | -2.573          | -1.819 | -11.418 | <0.001   |
|        | T4                               | 0.137  | 0.197                   | -0.249          | 0.523  | 0.694   | 0.488    |
| -4DI   | T1                               | -1.597 | 0.126                   | -1.843          | -1.350 | -12.711 | <0.001   |
|        | T3                               | -2.756 | 0.189                   | -3.127          | -2.385 | -14.564 | <0.001   |
|        | T4                               | -0.409 | 0.194                   | -0.789          | -0.028 | -2.107  | 0.035    |
| -1DI   | T1                               | -1.539 | 0.127                   | -1.788          | -1.291 | -12.137 | <0.001   |
|        | T3                               | -2.675 | 0.189                   | -3.046          | -2.304 | -14.128 | <0.001   |
|        | T4                               | -0.084 | 0.196                   | -0.468          | 0.299  | -0.430  | 0.667    |
| 3DI    | T1                               | -1.305 | 0.126                   | -1.551          | -1.059 | -10.393 | <0.001   |
|        | T3                               | -1.925 | 0.193                   | -2.303          | -1.547 | -9.980  | <0.001   |
|        | T4                               | -0.397 | 0.194                   | -0.778          | -0.016 | -2.043  | 0.041    |
| 5DI    | T1                               | -0.598 | 0.128                   | -0.850          | -0.347 | -4.669  | <0.001   |
|        | T3                               | -0.829 | 0.193                   | -1.207          | -0.450 | -4.291  | <0.001   |
|        | T4                               | 0.090  | 0.197                   | -0.296          | 0.476  | 0.457   | 0.648    |

<sup>a</sup> Fungicides were applied 1, 7, 4 or 10 days before, or 3 or 5 days after the day of inoculation (DI) with a mixture of *F. graminearum* strains.

<sup>b</sup> Fungicide treatments were grouped as T1 (when contain only DMI), T3 when contain DMI and SDHI, and T4 when contain MBC.

<sup>c</sup> Model 2.12 in Table 3;  $L$ , log-transformed response ratio for each treatment relative to the non-treated control; se( $L$ ), standard error of  $L$ ; 95% CI of  $L$ , limits of the 95% confidence interval of  $L$ ;  $Z$ , standard normal statistic from the GLMM, probability value (significant level) of  $Z$ .
